# Supplementary material
Source: PubMed Central journal article supplement (PMC2134986)

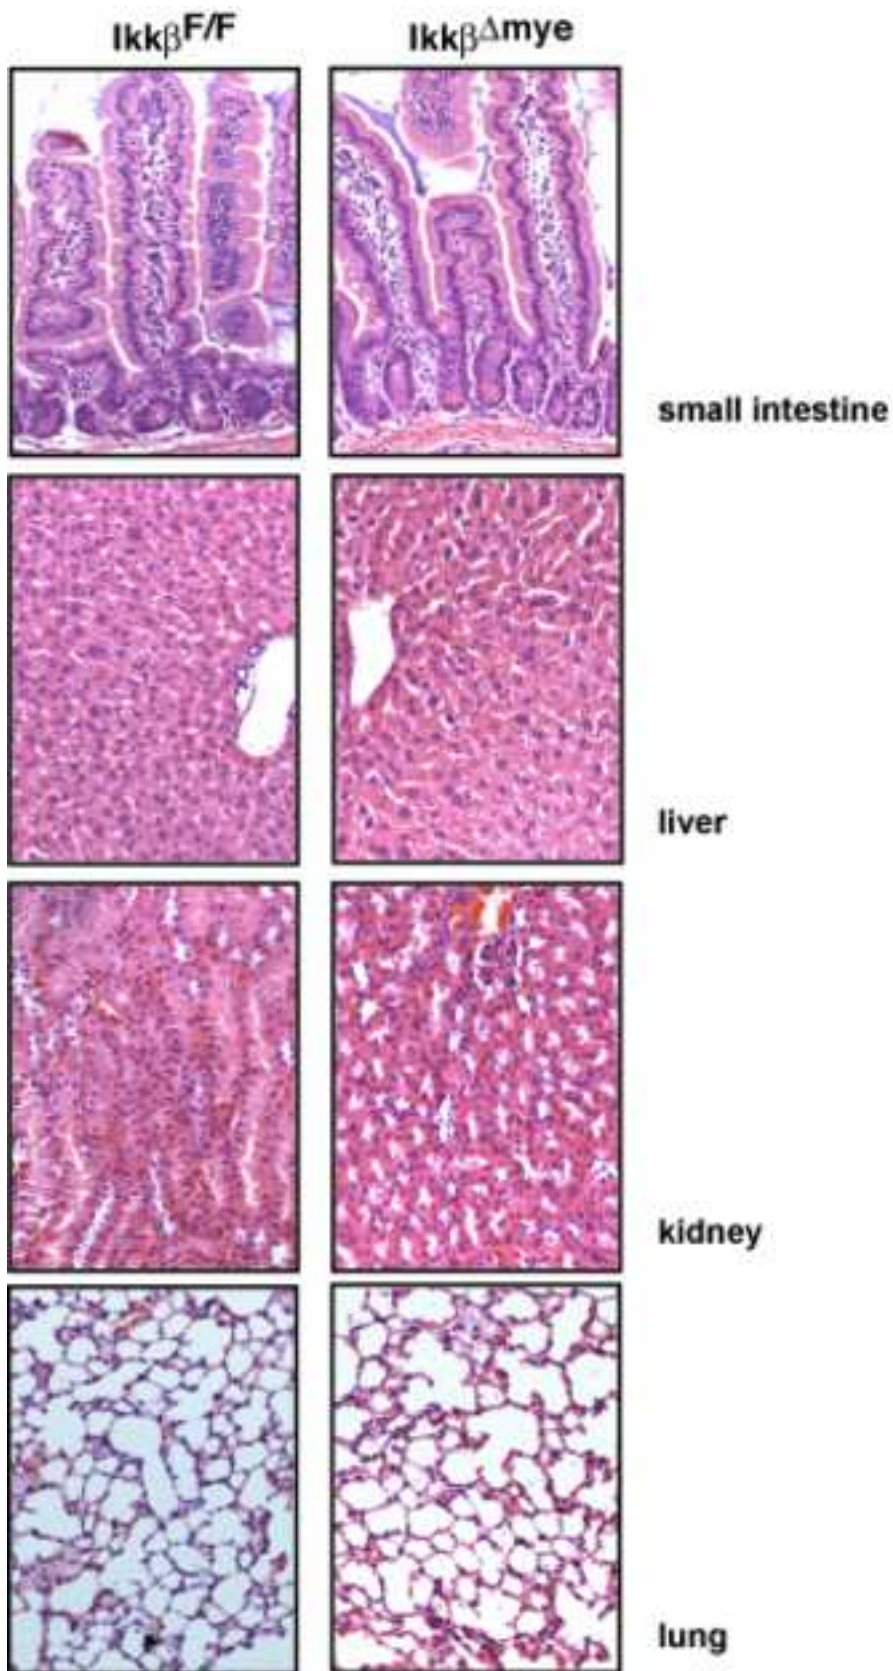

Supplementary Figure 1

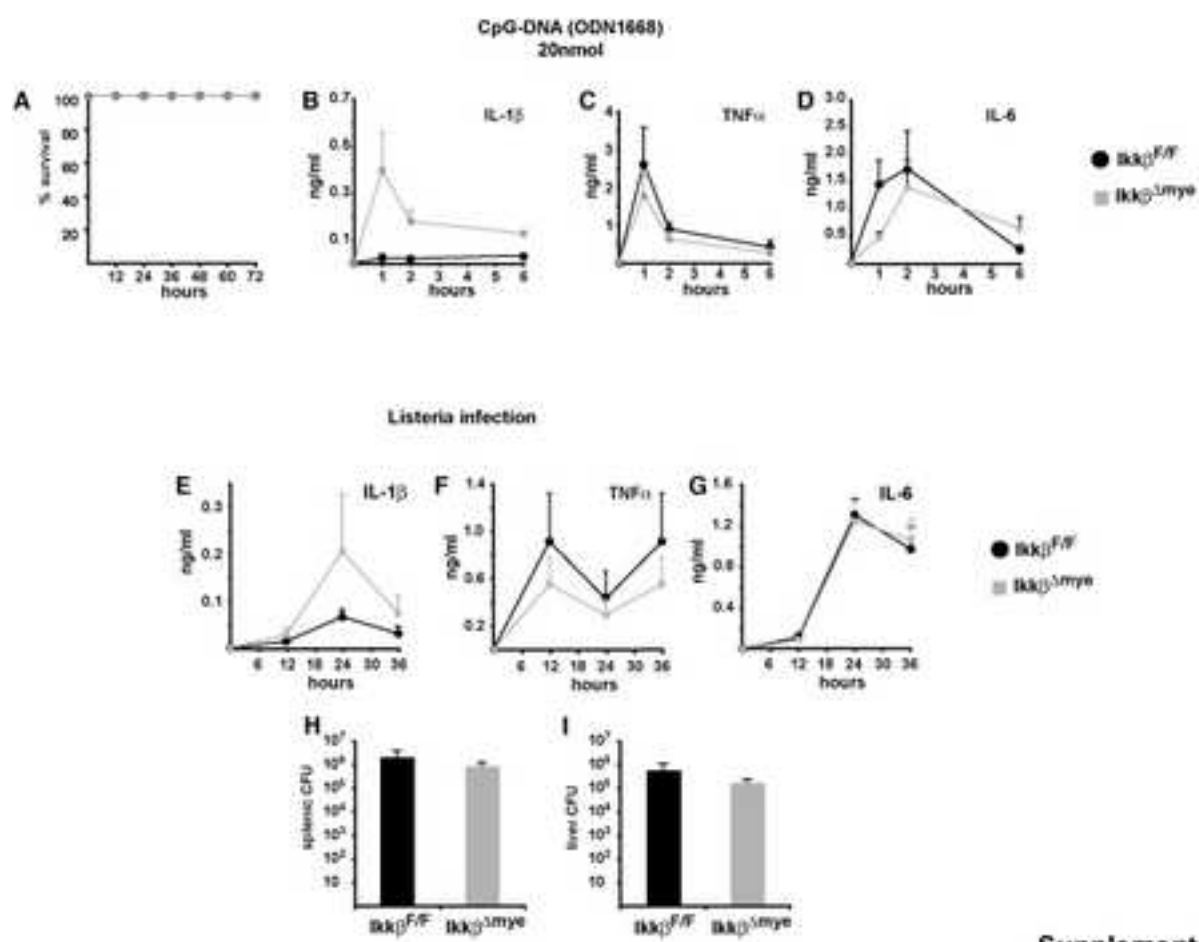

Supplementary Figure 2

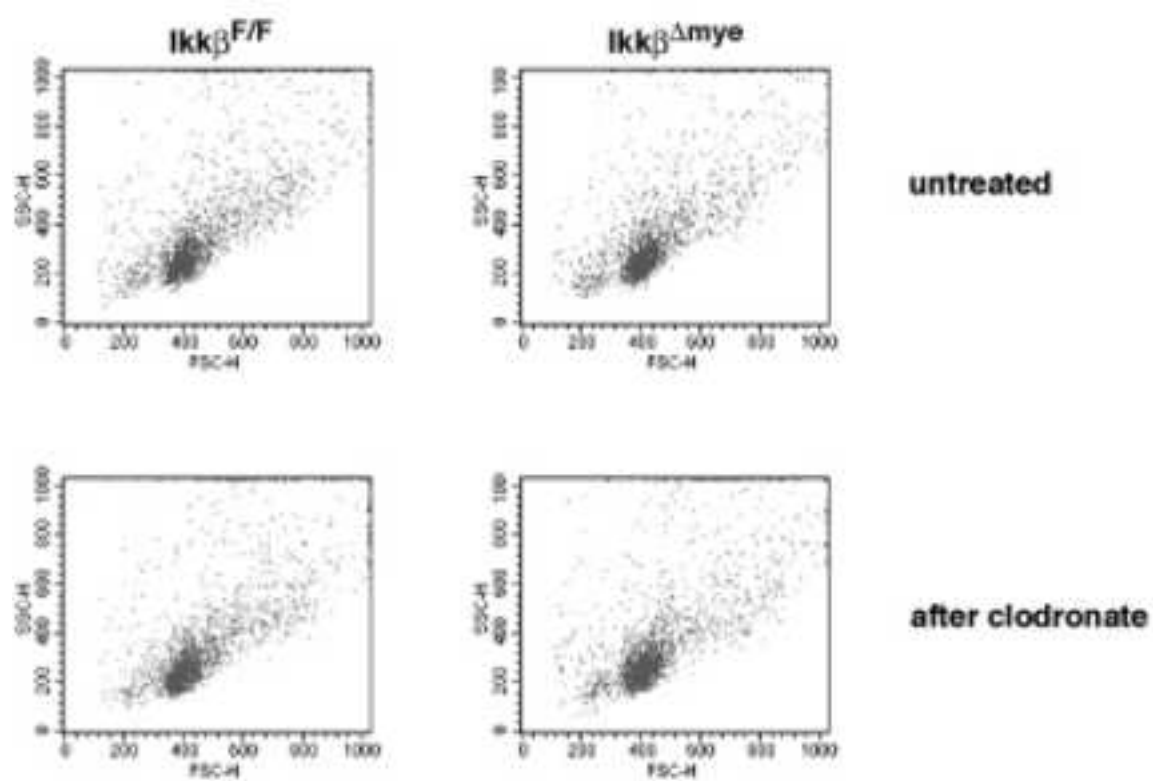

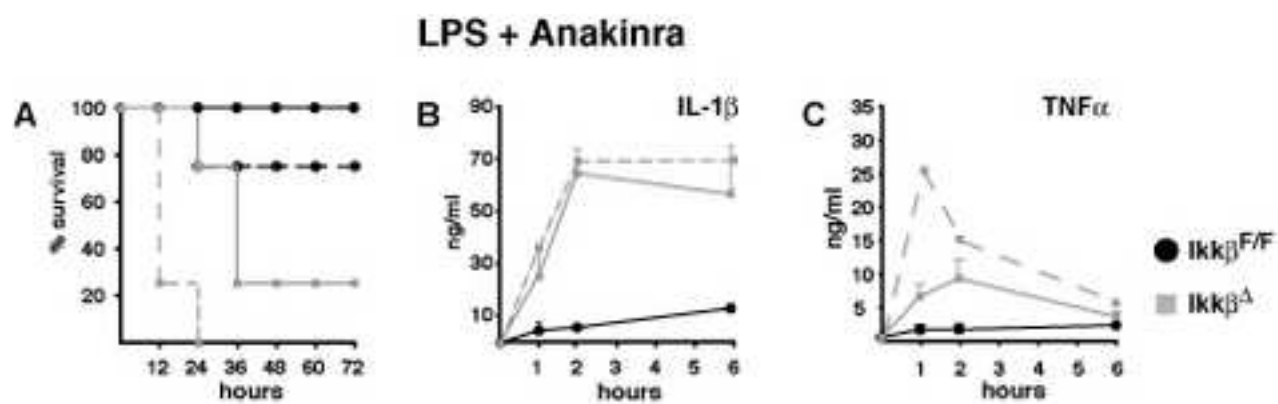

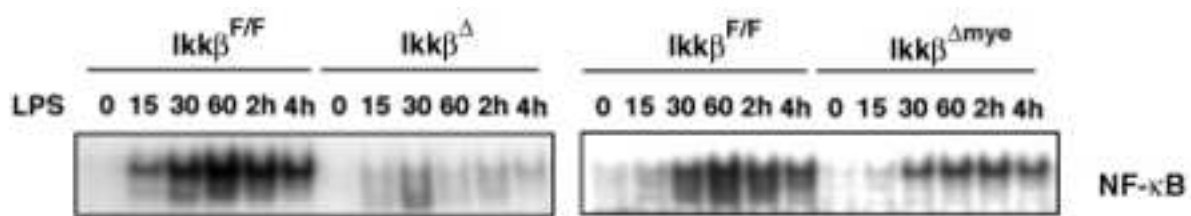

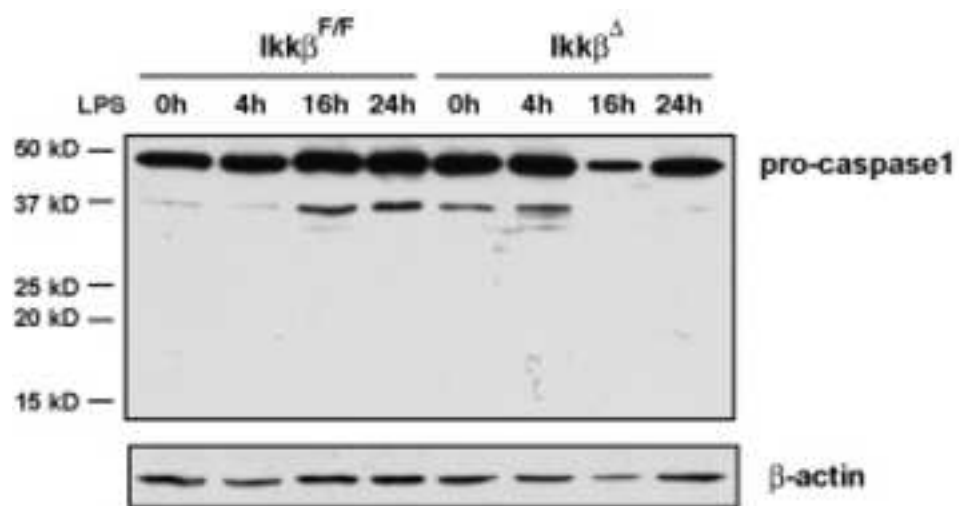

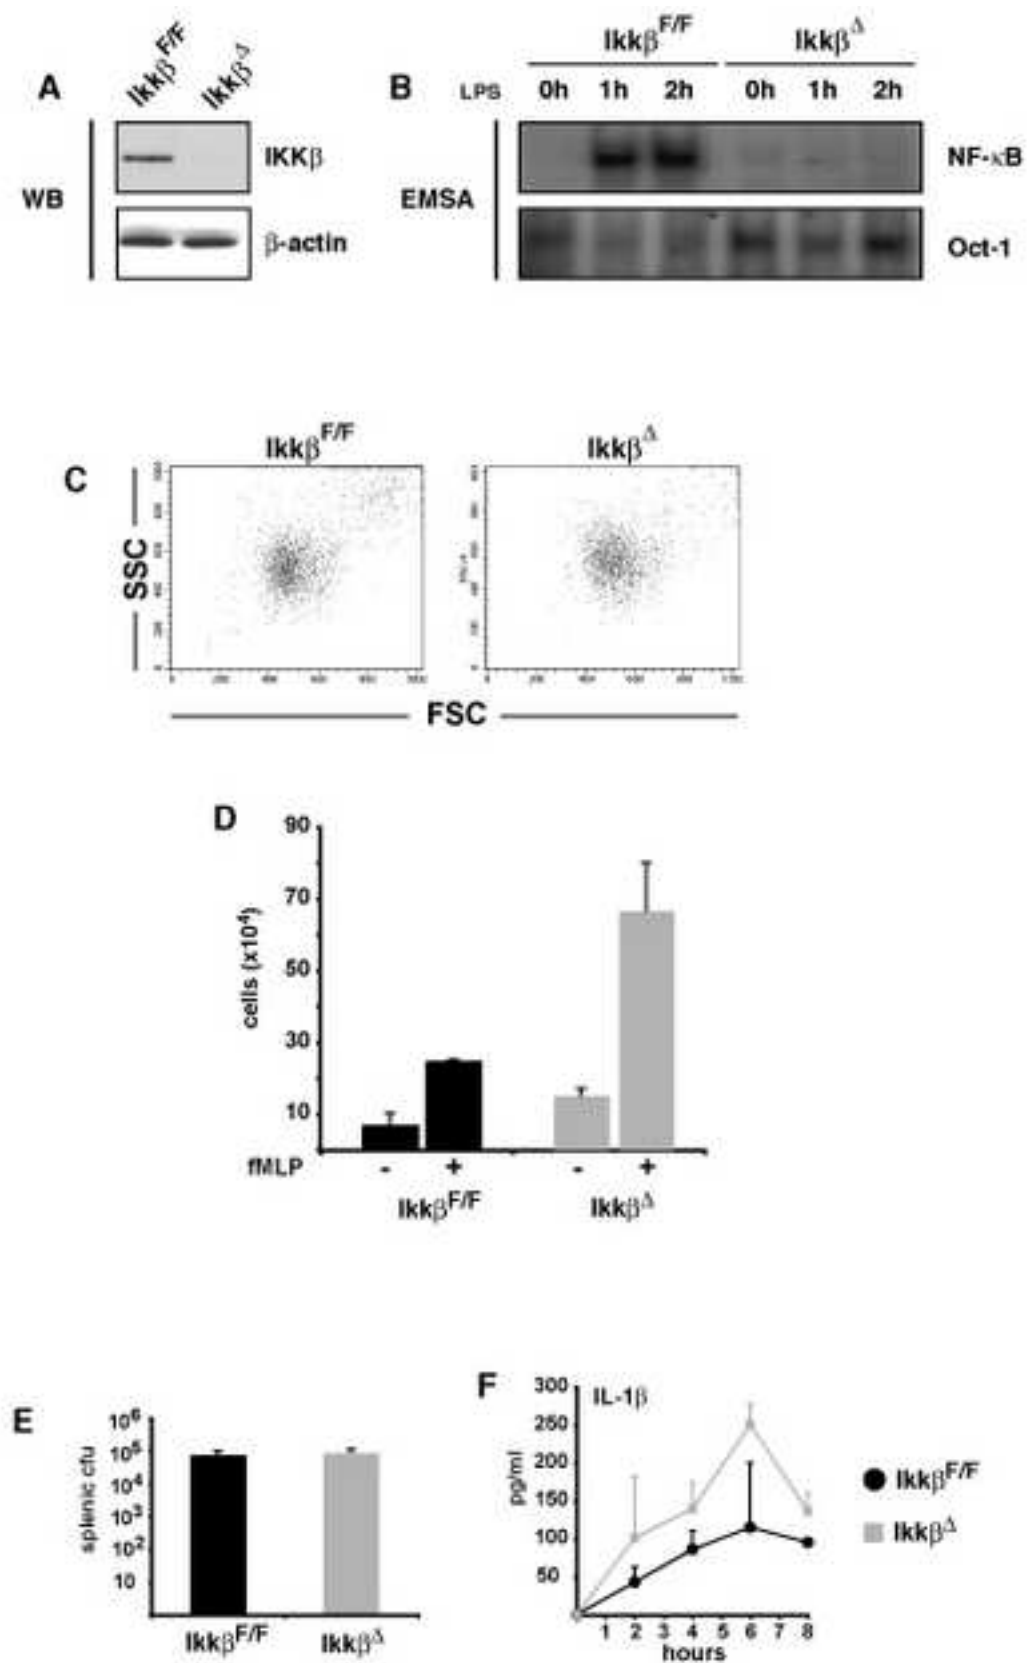

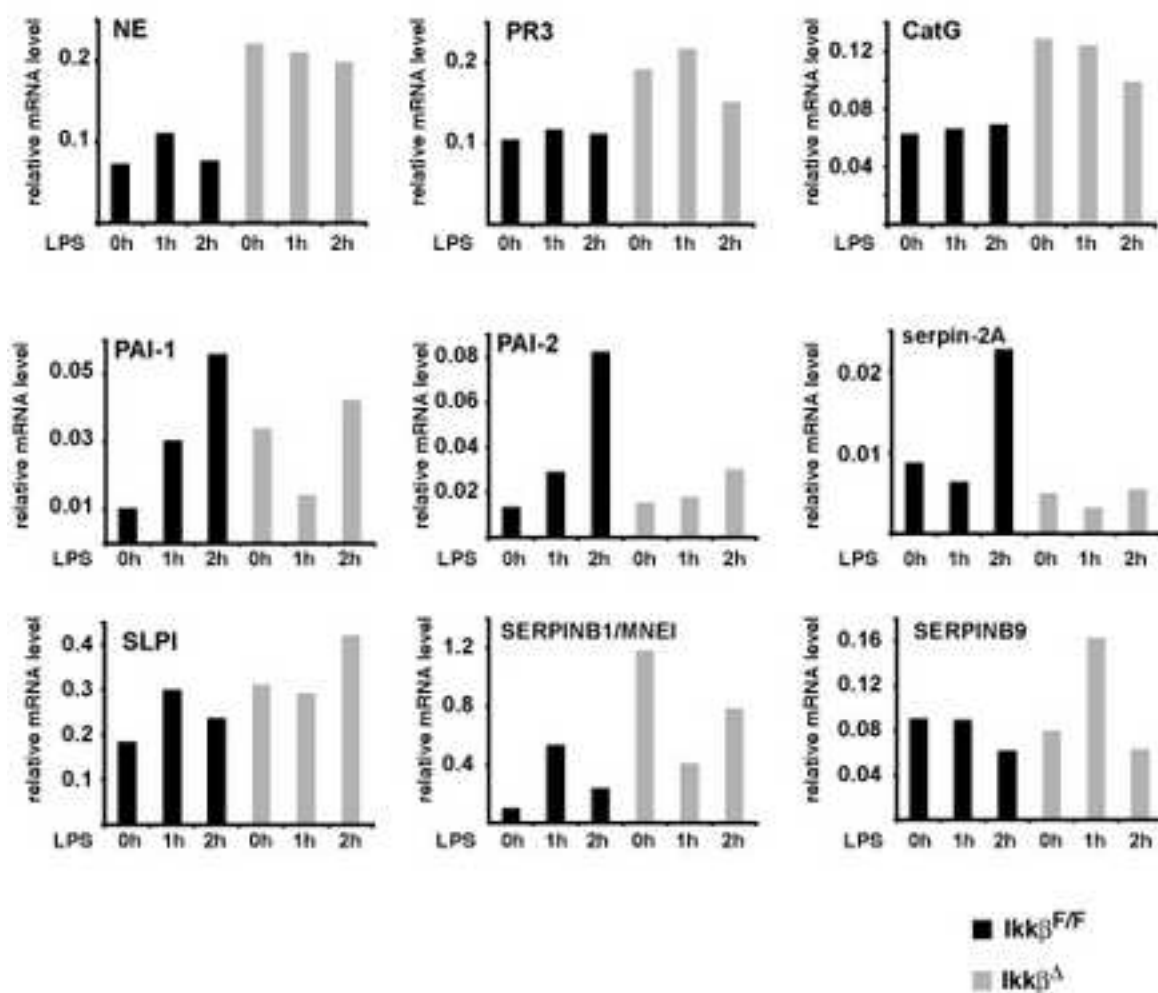



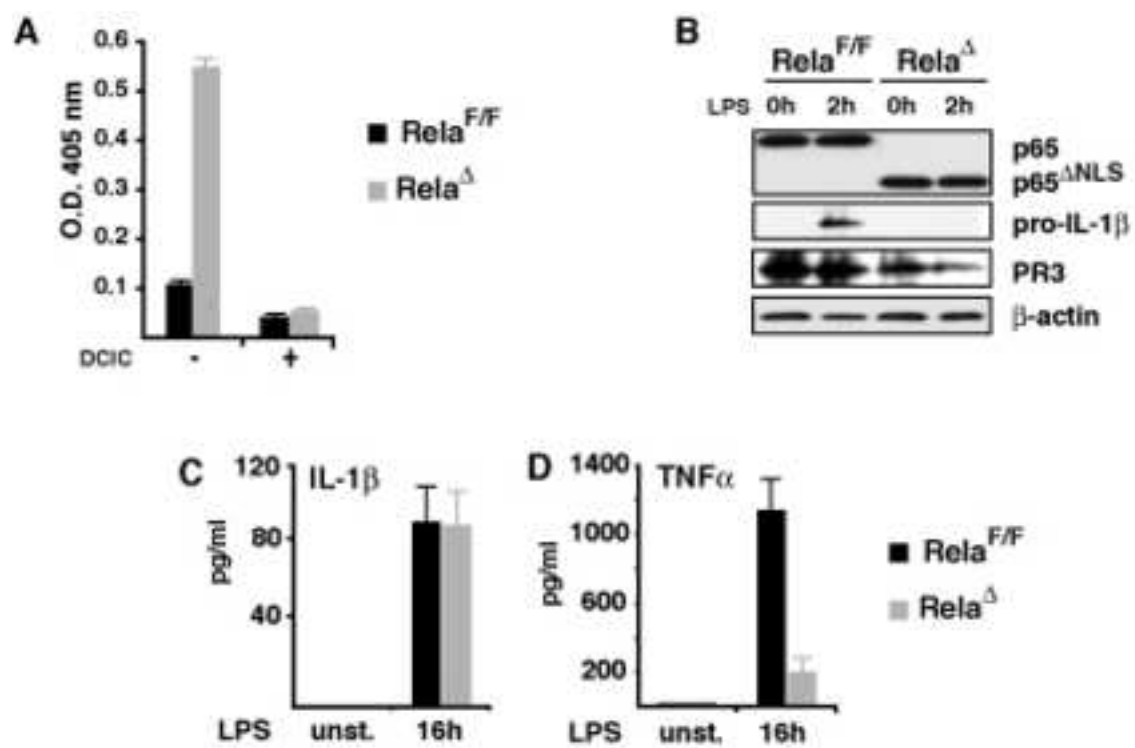

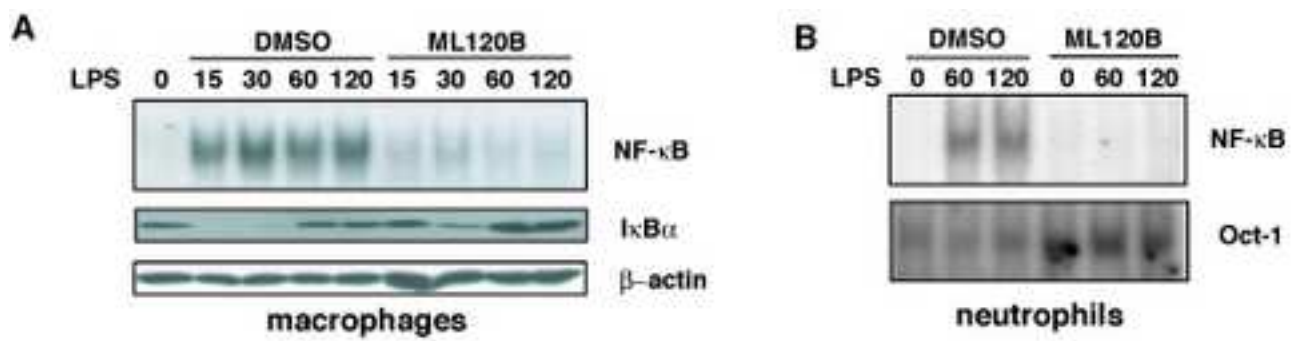

Supplement: NIHMS30277-supplement-01.pdf [file NIHMS30277-supplement-01.pdf]
